# Supplementary material for: γ-Glutamyltransferase, but not markers of hepatic fibrosis, is associated with cardiovascular disease in older people with type 2 diabetes mellitus: the Edinburgh Type 2 Diabetes Study
Source: PubMed Central journal article supplement (PMC4473275; doi:10.1007/s00125-015-3575-y), 2015-03-29
Supplement: 125_2015_3575_MOESM2_ESM.pdf [file 125_2015_3575_MOESM2_ESM.pdf]

**ESM Table 2. Biomarkers of liver injury in subjects with and without incident cardiovascular disease (subset of subjects without prevalent CVD at baseline, values are mean (sd), median (IQR) or % (n)).**

|                                | CVD, yes<br>N=35 | CVD, no<br>N=628 | p value | CAD, yes<br>N=19 | CAD, no<br>N=644 | p value |
|--------------------------------|------------------|------------------|---------|------------------|------------------|---------|
| ALT, U/L                       | 46.0 (16.7)      | 43.5 (14.1)      | 0.266   | 48.2 (19.1)      | 43.5 (13.5)      | 0.218   |
| AST, U/L                       | 34.2 (13.0)      | 31.1 (9.7)       | 0.047   | 35.6 (14.6)      | 31.1 (9.7)       | 0.125   |
| GGT, U/L                       | 21.0 (10-37)     | 16.0 (10-27)     | 0.102   | 19.0 (9-56)      | 17.0 (10-28)     | 0.504   |
| Steatosis, % yes <sup>a</sup>  | 50.0 (15)        | 57.8 (307)       | 0.450   | 43.8 (7)         | 57.8 (315)       | 0.309   |
| CK18, U/L <sup>a</sup>         | 108.9 (85-146)   | 103.6 (76-137)   | 0.356   | 102.1 (84-176)   | 104.8 (77-137)   | 0.724   |
| APRI                           | 0.26 (0.21-0.34) | 0.25 (0.20-0.33) | 0.669   | 0.26 (0.20-0.40) | 0.25 (0.20-0.33) | 0.782   |
| AST/ALT ratio                  | 0.75 (0.2)       | 0.73 (0.2)       | 0.357   | 0.75 (0.1)       | 0.73 (0.2)       | 0.640   |
| ELF score <sup>b</sup>         | 9.3 (0.8)        | 8.9 (0.9)        | 0.066   | 9.1 (0.7)        | 8.9 (0.9)        | 0.416   |
| FIB4                           | 1.39 (0.6)       | 1.33 (0.6)       | 0.494   | 1.42 (0.6)       | 1.33 (0.6)       | 0.417   |
| NFS                            | -0.81 (1.1)      | -0.72 (1.1)      | 0.600   | -0.90 (1.0)      | -0.72 (1.1)      | 0.440   |
| Platelets, x10 <sup>9</sup> /L | 266.9 (65.6)     | 259.8 (69.7)     | 0.502   | 269.7 (68.4)     | 259.9 (67.8)     | 0.460   |

Mean follow-up 4.4 years, except for CK18, ELF and steatosis where mean follow-up was 3.5 years.

<sup>a</sup> Incident CVD n=30/561 incident CAD n=16/561; <sup>b</sup> incident CVD n=24/444 incident CAD n=13/444.

**ALT** alanine aminotransferase; **APRI** aspartate aminotransferase to platelet ratio index; **AST** aspartate aminotransferase, **CAD** coronary artery disease; **CK18** cytokeratin-18; **CVD** cardiovascular disease; **ELF** Enhanced Liver Fibrosis; **FIB4** Fibrosis-4 score; **GGT** gammaglutamyl transferase; **NFS** NAFLD Fibrosis Score
