# Supplementary material for: γ-Glutamyltransferase, but not markers of hepatic fibrosis, is associated with cardiovascular disease in older people with type 2 diabetes mellitus: the Edinburgh Type 2 Diabetes Study
Source: PubMed Central journal article supplement (PMC4473275; doi:10.1007/s00125-015-3575-y), 2015-03-29
Supplement: 125_2015_3575_MOESM3_ESM.pdf [file 125_2015_3575_MOESM3_ESM.pdf]

**ESM Table 3. Multivariable association between liver markers and incident cardiovascular disease events – contribution of included covariables. Values are hazard ratios (95%CI)**

|                             | All cardiovascular disease |         | Coronary artery disease |         |
|-----------------------------|----------------------------|---------|-------------------------|---------|
|                             | HR (95%CI)                 | p value | HR (95%CI)              | p value |
| GGT, log <sub>2</sub>       | 1.25 (0.99, 1.59)          | 0.062   | 1.28 (0.99, 1.66)       | 0.064   |
| + Age                       | 1.29 (1.05, 1.58)          | 0.016   | 1.30 (1.00, 0.68)       | 0.048   |
| + BP lowering medication    | 1.27 (1.03, 1.55)          | 0.024   | 1.28 (0.99, 1.65)       | 0.064   |
| + Lipid lowering medication | 1.26 (1.03, 1.56)          | 0.028   | 1.28 (0.99, 1.67)       | 0.060   |
| + SIMD                      | 1.27 (1.02, 1.58)          | 0.031   | 1.28 (0.97, 1.67)       | 0.080   |
| + Alcohol excess            | 1.25 (1.00, 1.54)          | 0.044   | 1.28 (0.96, 1.73)       | 0.099   |
| + Sex                       | 1.24 (1.00, 1.53)          | 0.048   | 1.28 (0.98, 1.67)       | 0.068   |
| + Diabetes treatment type   | 1.23 (0.99, 1.54)          | 0.064   | 1.23 (0.93, 1.61)       | 0.145   |
| + Ever smoked               | 1.25 (0.98, 1.58)          | 0.069   | 1.28 (0.96, 1.71)       | 0.098   |
| + All                       | 1.24 (0.97, 1.59)          | 0.086   | 1.33 (1.00, 1.78)       | 0.053   |

**BP** blood pressure; **GGT** gamma-gluyamyl transferase; **HR** hazard ratio; **SIMD** Scottish Index of Multiple Deprivation
