# Supplementary material for: γ-Glutamyltransferase, but not markers of hepatic fibrosis, is associated with cardiovascular disease in older people with type 2 diabetes mellitus: the Edinburgh Type 2 Diabetes Study
Source: PubMed Central journal article supplement (PMC4473275; doi:10.1007/s00125-015-3575-y), 2015-03-29
Supplement: 125_2015_3575_MOESM6_ESM.pdf [file 125_2015_3575_MOESM6_ESM.pdf]

**ESM Table 6. Multivariable association between liver markers and any incident cardiovascular disease events (subjects with NAFL). Values are hazard ratios (95%CI)**

|                                     | Model 1           | p value | Model 2             | p value | Model 3             | p value |
|-------------------------------------|-------------------|---------|---------------------|---------|---------------------|---------|
| ALT, U/L                            | 0.99 (0.97,1.02)  | 0.446   | 0.98 (0.968,1.01)   | 0.236   | 0.98 (0.96,1.01)    | 0.219   |
| AST, U/L                            | 1.01 (0.97,1.04)  | 0.800   | 1.00 (0.97,1.04)    | 0.851   | 1.00 (0.96,1.04)    | 0.860   |
| GGT, log <sub>2</sub> <sup>a</sup>  | 1.58 (1.15,2.17)  | 0.005   | 1.57 (1.13,2.18)    | 0.007   | 1.56 (1.08,2.28)    | 0.019   |
| CK18, log <sub>2</sub> <sup>a</sup> | 0.91 (0.54,1.52)  | 0.711   | 0.91 (0.55,1.52)    | 0.718   | 0.98 (0.58,1.66)    | 0.944   |
| APRI, log <sub>2</sub> <sup>a</sup> | 0.94 (0.52,1.70)  | 0.840   | 0.80 (0.43,1.51)    | 0.495   | 0.69 (0.36,1.31)    | 0.691   |
| AST:ALT ratio                       | 8.14 (0.77,85.48) | 0.081   | 26.62 (2.03,349.29) | 0.012   | 20.10 (1.36,296.91) | 0.029   |
| ELF score                           | 1.10 (0.80,1.50)  | 0.567   | 1.19 (0.86,1.66)    | 0.294   | 1.20 (0.84,1.07)    | 0.317   |
| FIB4                                | 1.06 (0.47,2.35)  | 0.895   | 0.92 (0.39,2.19)    | 0.854   | 0.70 (0.28,1.73)    | 0.436   |
| NFS                                 | 0.96 (0.83,1.11)  | 0.564   | 0.98 (0.84,1.14)    | 0.784   | 0.97 (0.84,1.12)    | 0.682   |
| Platelets, x10 <sup>9</sup> /L      | 1.00 (1.00,1.01)  | 0.479   | 1.00 (1.00,1.01)    | 0.145   | 1.01 (1.00,1.01)    | 0.068   |

ALT, AST, GGT, APRI, AST:ALT ratio, FIB4, NFS and platelets total n=319 incident CVD n=38; CK18 total n=295 incident CVD n=29; ELF total n=231 incident CVD n=26.

<sup>a</sup> APRI, CK18 and GGT analysed on the Log<sub>2</sub> scale for linearization, therefore odds ratios relate to a doubling of the marker.

Model 1 – Unadjusted; Model 2 - Adjusted for age and sex; Model 3 - Adjusted for age, sex, duration of diabetes, treatment of diabetes, lipid lowering drugs, blood pressure lowering drugs, deprivation (Scottish Index of Multiple Deprivation quintile), smoking status, excess alcohol consumption, body mass index,

systolic blood pressure, diastolic blood pressure, HbA1c, HDL cholesterol, total cholesterol and estimated glomerular filtration rate. Incident analysis additionally adjusted for prevalence cardiovascular disease at baseline.

**ALT** alanine aminotransferase; **APRI** aspartate aminotransferase to platelet ratio index; **AST** aspartate aminotransferase; **CK18** cytokeratin-18; **ELF** Enhanced Liver Fibrosis; **FIB4** Fibrosis-4 score; **GGT** gammaglutamyl transferase; **NFS** NAFLD Fibrosis Score
