# Supplementary material for: γ-Glutamyltransferase, but not markers of hepatic fibrosis, is associated with cardiovascular disease in older people with type 2 diabetes mellitus: the Edinburgh Type 2 Diabetes Study
Source: Springer Nature journal article supplement (doi:10.1007/s00125-015-3575-y), 2015-03-29
Supplement: MOESM1 [file 8092952]

**ESM Table 1. Biomarkers of liver injury in all subjects with and without prevalent cardiovascular disease at baseline (values are mean (sd), median (IQR) or % (n)).**

|                                | CVD, yes<br>N=370 | CVD, no<br>N=663 | p value | CAD, yes<br>N=317 | CAD, no<br>N=716 | p value |
|--------------------------------|-------------------|------------------|---------|-------------------|------------------|---------|
| ALT, U/L                       | 41.9 (12.6)       | 43.7 (14.2)      | 0.048   | 42.1 (13.0)       | 43.5 (14.0)      | 0.164   |
| AST, U/L                       | 30.4 (10.5)       | 31.3 (10.0)      | 0.178   | 30.5 (11.0)       | 31.2 (9.8)       | 0.282   |
| GGT, U/L                       | 20.0 (13-37)      | 17.0 (10-29)     | <0.001  | 20.0 (13-37)      | 17.0 (11-29)     | <0.001  |
| Steatosis, % yes <sup>a</sup>  | 54.1 (164)        | 57.5 (319)       | 0.350   | 51.2 (133)        | 58.5 (350)       | 0.051   |
| CK18, U/L <sup>a</sup>         | 100.7 (79-141)    | 104.8 (77-137)   | 0.911   | 99.1 (74-138)     | 105.8 (78-138)   | 0.589   |
| APRI                           | 0.25 (0.19-0.35)  | 0.25 (0.20-0.33) | 0.848   | 0.25 (0.19-0.36)  | 0.25 (0.20-0.33) | 0.860   |
| AST/ALT ratio                  | 0.74 (0.2)        | 0.73 (0.2)       | 0.759   | 0.74 (0.2)        | 0.74 (0.2)       | 0.869   |
| ELF score <sup>b</sup>         | 8.9 (0.8)         | 8.9 (0.9)        | 0.930   | 8.9 (0.8)         | 8.9 (0.9)        | 0.950   |
| FIB4                           | 1.39 (0.7)        | 1.34 (0.6)       | 0.164   | 1.42 (0.7)        | 1.33 (0.6)       | 0.060   |
| NFS                            | -27.0 (2.5)       | -27.4(2.6)       | 0.018   | -26.9 (2.5)       | -27.4 (2.6)      | 0.010   |
| Platelets, x10 <sup>9</sup> /L | 254.5 (72.9)      | 260.1 (67.8)     | 0.240   | 252.4 (74.3)      | 260.8 (67.4)     | 0.094   |

<sup>a</sup> Prevalent CVD n=303/858 prevalent CAD n=260/858; <sup>b</sup> Prevalent CVD n=234/679 prevalent CAD n=199/679.

**ALT** alanine aminotransferase; **APRI** aspartate aminotransferase to platelet ratio index; **AST** aspartate aminotransferase, **CAD** coronary artery disease; **CK18** cytokeratin-18; **CVD** cardiovascular disease; **ELF** Enhanced Liver Fibrosis; **FIB4** Fibrosis-4 score; **GGT** gammaglutamyl transferase; **NFS** NAFLD Fibrosis Score
