# Supplementary material for: γ-Glutamyltransferase, but not markers of hepatic fibrosis, is associated with cardiovascular disease in older people with type 2 diabetes mellitus: the Edinburgh Type 2 Diabetes Study
Source: Springer Nature journal article supplement (doi:10.1007/s00125-015-3575-y), 2015-03-29
Supplement: MOESM4 [file 8092952]

**ESM Table 4. Multivariable association between liver markers and incident cardiovascular disease events (all subjects). Values are hazard ratios (95%CI)**

|                                        | Model 1           | p value | Model 2          | p value | Model 3          | p value |
|----------------------------------------|-------------------|---------|------------------|---------|------------------|---------|
| ALT, U/L                               | 0.99 (0.98,1.01)  | 0.379   | 0.99 (0.98,1.01) | 0.262   | 0.99 (0.97,1.00) | 0.140   |
| AST, U/L                               | 1.00 (0.99,1.02)  | 0.674   | 1.00 (0.98,1.02) | 0.888   | 1.00 (0.98,1.02) | 0.794   |
| GGT, log <sub>2</sub> <sup>a</sup>     | 1.28 (1.10,1.49)  | 0.001   | 1.26 (1.08,1.47) | 0.003   | 1.18 (1.00,1.39) | 0.045   |
| Steatosis, % yes <sup>b</sup>          | 1.24 (0.75,2.04)  | 0.399   | 1.32 (0.80,2.17) | 0.282   | 1.31 (0.78,2.20) | 0.307   |
| CK18, log <sub>2</sub> <sup>a, b</sup> | 1.15 (0.84,1.56)  | 0.380   | 1.20 (0.88,1.64) | 0.254   | 1.07 (0.78,1.46) | 0.687   |
| APRI, log <sub>2</sub> <sup>a</sup>    | 0.97 (0.69,1.36)  | 0.873   | 0.81 (0.56,1.17) | 0.263   | 0.78 (0.54,1.13) | 0.193   |
| AST:ALT ratio                          | 2.90 (0.92,9.16)  | 0.069   | 2.67 (0.86,8.33) | 0.090   | 2.85 (0.90,8.98) | 0.074   |
| ELF score <sup>c</sup>                 | 1.20 (0.98,1.48)  | 0.082   | 1.23 (0.97,1.56) | 0.095   | 1.15 (0.88,1.50) | 0.304   |
| FIB4                                   | 1.15 (0.82,1.62)  | 0.421   | 0.94 (0.63,1.39) | 0.747   | 0.91 (0.61,1.34) | 0.621   |
| NFS                                    | 0.97 (0.90, 1.06) | 0.542   | 0.98 (0.90,1.07) | 0.642   | 0.96 (0.88,1.04) | 0.320   |
| Platelets, x10 <sup>9</sup> /L         | 1.00 (1.00,1.00)  | 0.596   | 1.00 (1.00,1.01) | 0.071   | 1.00 (1.00,1.01) | 0.101   |

<sup>a</sup> APRI, CK18 and GGT analysed on the Log<sub>2</sub> scale for linearization, therefore odds ratios relate to a doubling of the marker; <sup>b</sup> Incident CVD n=30/561; <sup>c</sup> incident CVD n=24/444.

Model 1 – Unadjusted; Model 2 - Adjusted for age and sex; Model 3 - Adjusted for age, sex, duration of diabetes, treatment of diabetes, lipid lowering drugs, blood pressure lowering drugs, deprivation (Scottish Index of Multiple Deprivation quintile), smoking status, excess alcohol consumption, body mass index,

systolic blood pressure, diastolic blood pressure, HbA1c, HDL cholesterol, total cholesterol and estimated glomerular filtration rate. Incident analysis additionally adjusted for prevalence cardiovascular disease at baseline.

**ALT** alanine aminotransferase; **APRI** aspartate aminotransferase to platelet ratio index; **AST** aspartate aminotransferase; **CK18** cytokeratin-18; **ELF** Enhanced Liver Fibrosis; **FIB4** Fibrosis-4 score; **GGT** gammaglutamyl transferase; **NFS** NAFLD Fibrosis Score
